# Supplementary material
Source: Springer Nature journal article supplement (https://www.springermedizin.de/resource/supplementary/13012_2006_196_MOESM7_ESM.pdf/9629446)
Supplement: MOESM7 [file 9629446]

I know  
I should

**KNOWLEDGE**

I want to

**DESIRE**

I can

**SKILLS**

It's worthwhile

**OPTIMISM**

It's easy

**FACILITATION**

I'm joining in

**STIMULATION**

That was  
a success

**REINFORCEMENT**
